# Supplementary material
Source: HighWire-hosted journal article supplement (https://bmjopen.bmj.com/content/8/6/e020080)
Supplement: inline-supplementary-material-1 [file inline-supplementary-material-1.pdf]

# Appendix 1. A systematic review protocol

## Measuring the Quality of Child and Adolescent Health Literacy Instruments: A Systematic Review

Shuaijun Guo<sup>1\*</sup>, Rebecca Armstrong<sup>1</sup>, Elizabeth Waters<sup>1</sup>, Thirunavukkarasu Sathish<sup>1</sup>, Sheikh M Alif<sup>1</sup>, Geoffrey R Browne<sup>1</sup>, Xiaoming Yu<sup>2\*</sup>

<sup>1</sup> School of Population and Global Health, The University of Melbourne, Melbourne, Australia

<sup>2</sup> Institute of Child and Adolescent Health, School of Public Health, Peking University, Beijing, China

\* Corresponding author email: gshj1986@gmail.com yxm@bjmu.edu.cn

### Background

Health literacy research has been a growing interest by researchers across the globe. The term *'health literacy'* was first used in 1974 in the proceedings of a health education conference discussing health education as a social policy issue affecting the healthcare system, mass communication and the education system (1, 2). However, few references were found regarding health literacy in the literature until 1992 (3). Since 1992, health literacy has been broadly studied both in clinical and public health contexts. In clinical settings, health literacy is typically defined as *'the degree to which individuals have the capacity to obtain, process and understand basic health information and services needed to make appropriate health decisions'* by the Institute of Medicine (IOM) in America (4). In such circumstances, health literacy is a derivative concept from literacy and numeracy skills, which is often used as a risk factor that needs to be identified and appropriately managed for patients and health professionals (5). Accordingly, health literacy measurement tools and 'screening aids' for clinicians are developed to assess patient literacy levels, and help health professionals to tailor health information for better communication with their patients (6). From the public health perspective, health literacy is defined and accepted by World Health Organization (WHO) as *'the cognitive and social skills which determine the motivation and ability of individuals to gain access to, understand and use information in ways which promote and maintain good health'* (7). This understanding of health literacy identifies it as a broad concept, which is seen as a personal asset to enable individuals to take more control over their health and determinants of health (5). With a different understanding of the concept, health literacy measures vary in a different way. Although health literacy measurement varies and is still

being debated (1, 8-10), there is consistent evidence showing health literacy is of potential importance and considered as a public health goal internationally. A recent WHO report pointed out that poor health literacy skills were associated with riskier behaviours, poorer health status, less self-management and longer hospitalization and more health costs (11).

Based on a preliminary search of health literacy, there were more interests in studies focusing on adult health literacy than adolescent health literacy. However, previous research studies suggested that poor health literacy was a prevalent problem in adolescents. In Australia, the 2006 National Health Literacy Survey reported that 67.6% of adolescents aged 15 to 19 years old did not attain the minimum skills required to deal with health information and service in everyday life (12). Compared with adult health literacy, there are several reasons for the potential importance of adolescent health literacy: 1) adolescents are future mainstream and independent healthcare consumers, a health literate person can contribute to less health care costs, better health status compared to that is not health literate (13); 2) adolescents are at a critical stage of development characterised by physical, emotional and cognitive changes, attempting to prepare for independence but lacking the adequate ability of reasoning and decision-making. Therefore, improving their health literacy skills could support sound health decisions in future (14, 15); 3) low health literacy has been demonstrated to associate with high levels of health-risk behaviors (16, 17) and low levels of health-promoting behaviors for adolescents (18); 4) enhancing health literacy through school-based interventions has great potential for improving students' access to and interpretation of health information (19). Adolescents spend most of their daily time in school, which means they can receive health education and learn how to improve healthy lifestyles and related skills through this setting (20, 21).

Health literacy is more challenging to understand for adolescents than that for adults. Researchers may have different understandings and underlying constructs when using the same definition. That is why there are such a large number of measurement tools of health literacy currently (22, 23), along with some newly-developed health literacy instruments (24). According to Mancuso (1), it is recommended to use specific assessment tools for a specific age group in a specific context. Studies measuring childhood and adolescent health literacy have been a research focus, particularly in the past five years (23). Ormshaw *et al.* (23) conducted a systematic review on measuring childhood and adolescent health literacy in 2011. They found 16 studies that were involved with health literacy measures in children and adolescents. The authors also identified 13 health topics and nine underlying components from existing health literacy instruments. However, the authors did not critically appraise health literacy indices explicitly regarding their validity and reliability. More importantly, the

authors did not assess the methodological quality of each included study. This may undermine the persuasiveness of its conclusion. To fill this knowledge gap, we aim to conduct a systematic review that examines studies' methodological quality and examine reliability and validity of each health literacy instrument, thus providing researchers with unbiased information about which instruments have good psychometric properties. The '*CO**nsensus-based Standards for the selection of health status Measurement IN**struments*' (COSMIN) group has recently developed as a critical appraisal tool (a checklist) to evaluate the methodological quality of studies on measurement properties of health measurement instruments (25). These measurement properties are divided into three domains: reliability, validity, and responsiveness (26). According to the COSMIN checklist, it is possible and scientific to critically appraise and compare psychometric properties of health literacy instruments for children and adolescents.

In this protocol, our target population is adolescent. According to the definition of the WHO, adolescents are those people aged 10 to 19 years and young people aged 10-24 years (27, 28). Given that the term '*adolescent*', '*child*', '*youth*' and '*young people*' is closely related, and Erikson (29) reckoned that children between the ages of 6 and 12 years could learn, compete and co-operate with others, we define our target group as those aged 6-24 years old.

## **Objectives of the review**

This review aims to identify which health literacy instruments have good psychometric properties for children and adolescents. Specifically, there are three objectives:

- 1) To examine the methodological quality of included studies that aim to measure health literacy in children and adolescents;
- 2) To examine the measurement properties (i.e. reliability; validity; responsiveness) of health literacy instruments in children and adolescents;
- 3) To compare the overall rating of measurement properties between each health literacy instrument used in children and adolescents.

## **Search strategy**

### ***Database and search terms***

As the term '*health literacy*' was first coined in 1974, articles published from 1st,January 1974 to 30th May 2014 in all languages will be searched. Search strategies will be first designed and then be consulted with two librarian experts. Articles indexed in the following seven databases: Medline, Pubmed, Embase, PsycINFO, CINAHL, ERIC and Cochrane

Library will be searched. The search key terms are ‘*health literacy*’ and ‘*assessment*’ according to previously published studies (1, 23, 30, 31). Age group for ‘*child, adolescent and young adult*’ will be defined in the database settings. The synonyms are listed in **Appendix Table 1**. These synonyms are connected by ‘*or*’ and search strategies are completed by ‘*and*’.

**Appendix Table 1** Searching terms in databases

| <b>Key term (1)</b>               | <b>Key term (2)</b>         |
|-----------------------------------|-----------------------------|
| health literacy                   | health literacy measur*     |
| health AND literacy AND education | health literacy assess*     |
|                                   | health literacy evaluat*    |
|                                   | health literacy instrument* |
|                                   | health literacy tool*       |

***Other sources of literature***

Searching other sources to identify relevant research including:

- Reference lists of identified studies;
- Reference lists of previous systematic reviews on health literacy (1, 23, 30-33).

**Eligibility criteria for inclusion and exclusion**

According to the guidelines recommended by Cochrane Handbook for systematic reviews (34), inclusion criteria will be addressed regarding population, intervention, comparison, outcome and study design (PICOS):

***Inclusion criteria-Participants***

The target group should be children and/or adolescents, any age from 6 to 24 years of age.

***Inclusion criteria-Interventions and Comparators***

As interventional studies are not our interest in this review, it is not applicable to set out guidelines for interventions and comparators

***Inclusion criteria-Outcomes***

The included studies must be involved with health literacy assessment for children and adolescents, that is, the study should specify the term ‘*health literacy*’, and studies are included if they report on at least one or more attributes of the three measurement properties: 1) reliability; 2) validity; and 3) responsiveness.

***Inclusion criteria-Study design***

The article should be research-based and peer-reviewed paper including study aim, methods, and results. Also, the study aim should focus on health literacy instrument development or validation.

### ***Exclusion criteria***

Studies will be excluded if they are: 1) not focusing on the target group; 2) not focusing on the health literacy instrument development or tool validation; 3) not research-based and peer-reviewed papers including editorials, comments and letters; 4) not reporting findings or results regarding any one of the measurement properties.

### **Study selection**

Search records will be kept including the names of databases searched, keywords, search timeframe, and the search results. All the electronic search results will be initially inputted into the bibliography software of EndNote X7 (Thomson Reuters, New York, NY), and other sources of literature results will be summarised in the print paper. This screening process will follow the Preferred Reporting Items for Systematic Reviews and Meta-Analysis (PRISMA) statement (35). One reviewer will screen studies by titles and abstracts. Secondly, full copies of articles identified will be obtained for thorough screening according to the inclusion criteria by two reviewers independently. Any disagreements in reviewer selections will be resolved at a meeting.

### **Quality assessment**

The methodological quality of each included study will be assessed by two reviewers independently using the COSMIN checklist (25). The checklist consists of nine boxes with 5-18 items concerning methodological standards for how each measurement property should be assessed. Four response options for each item of the COSMIN checklist are defined, representing ‘*excellent*’, ‘*good*’, ‘*fair*’ and ‘*poor*’ quality. An overall score for the methodological quality of a study will be determined for each measurement property separately, by taking the lowest rating of any items in a box (‘*worst score counts*’) (36). Discrepancies arise between the reviewers will be resolved through discussion, if necessary with a third independent person.

### **Data extraction**

Data extraction will be performed along with the assessment of methodological quality using

the COSMIN checklist (25). In addition, information on the interpretability (e.g. norm scores, floor-ceiling effects, minimal important change of the instruments), generalisability (e.g. characteristics of the study population and sampling procedure), respondent and administrative burden, and forms of administration will be also collected because they are important characteristics of a measurement instrument (26, 37). The data will be entered in an electronic form. Where possible, authors of the original studies will be contacted to obtain essential missing or additional data. Two reviewers will independently extract the data. Consensus should be reached afterward, if necessary with a third independent person.

## Data synthesis

The results of the quality of health literacy instruments will be assessed using Terwee's quality criteria (38), to see whether the results of the measurement attributes are '*positive*', '*negative*', or '*indeterminate*'. To summarise the overall ratings of the measurement properties of one health literacy instruments by different authors, the synthesis will be performed by combining the results of the quality of health literacy instruments, the results of methodological quality of health literacy measurement studies and the consistency of their results. The possible overall rating for a measurement property is '*positive*', '*indeterminate*', or '*negative*', accompanied by levels of evidence, similarly as was proposed by the Cochrane Back Review Group (39, 40). One reviewer will perform the data synthesis and a second reviewer will check the synthesised results. Discrepancies of the results will be resolved by discussion.

## References

1. Mancuso JM. Assessment and measurement of health literacy: An integrative review of the literature. *Nurs Health Sci* 2009;11(1):77-89.
2. Simonds SK. Health education as social policy. *Health Educ Monogr.* 1974;2(1\_suppl):1-10.
3. Speros C. Health literacy: concept analysis. *J Adv Nurs.* 2005;50(6):633-40.
4. Nielsen-Bohlman L, Panzer AM, Kindig DA. Health literacy: a prescription to end confusion. Washington DC, USA: The National Academies Press; 2004.
5. Nutbeam D. The evolving concept of health literacy. *Soc Sci Med.* 2008;67(12):2072-8.
6. Parker RM, Williams MV, Weiss BD, Baker DW, Davis TC, Doak CC, et al. Health literacy: report of the Council on Scientific Affairs. Ad Hoc Committee on Health Literacy for the Council on Scientific Affairs, American Medical Association. *JAMA.* 1999;281(6):552-7.
7. Nutbeam D. Health promotion glossary. *Health Promot Int.* 1998;13(4):349-64.
8. Mancuso JM. Health literacy: a concept/dimensional analysis. *Nurs Health Sci.* 2008;10(3):248-55.
9. Higgins JW, Begoray D, MacDonald M. A Social Ecological Conceptual Framework for Understanding Adolescent Health Literacy in the Health Education Classroom. *Am J Commun Psychol.* 2009;44(3-4):350-62.
10. Zarcadoolas C, Pleasant A, Greer DS. Understanding health literacy: an expanded model. *Health Promot Int.* 2005;20(2):195-203.
11. Kickbusch I, Pelikan JM, Apfel F, Tsouros A. Health literacy: the solid facts. Copenhagen, Denmark: WHO Regional Office for Europe, 2013.
12. Australian Bureau of Statistics. 4233.0-Health Literacy, Australia, 2006. Canberra: Australian Bureau of Statistics; 2008 Jun 25 [cited 2014 Mar 23]; Available from:

- <http://www.abs.gov.au/AUSSTATS/abs@.nsf/DetailsPage/4233.02006?OpenDocument>.
13. Ghaddar SF, Valerio MA, Garcia CM, Hansen L. Adolescent health literacy: the importance of credible sources for online health information. *J Sch Health*. 2012;82(1):28-36.
  14. Bacon JL. Adolescent sexuality and pregnancy. *Current Opinion in Obstetrics and Gynecology*. 2000;12(5):345-7.
  15. Paus T. Mapping brain maturation and cognitive development during adolescence. *Trends Cogn Sci*. 2005;9(2):60-8.
  16. Miles, SB, Stipek, D. Contemporaneous and Longitudinal Associations Between Social Behavior and Literacy Achievement in a Sample of Low-Income Elementary School Children. *Child Dev*. 2006;77(1):103-17.
  17. Conwell, LS, O'Callaghan, MJ, Andersen, MJ, Bor, W, Najman, JM, Williams, G. Early adolescent smoking and a web of personal and social disadvantage. *J Paediatr Child Health*. 2003;39(8):580-5.
  18. Chang LC. Health literacy, self-reported status and health promoting behaviours for adolescents in Taiwan. *J Clin Nurs*. 2011;20(1-2):190-6.
  19. Gazmararian, JA, Curran, JW, Parker, RM, Bernhardt, JM, DeBuono, BA. Public health literacy in America: an ethical imperative. *Am J Prev Med*. 2005;28(3):317-22.
  20. Brey RA, Clark SE, Wantz MS. Enhancing health literacy through accessing health information, products, and services: An exercise for children and adolescents. *J Sch Health*. 2007;77(9):640-4.
  21. Kickbusch I. Health literacy: an essential skill for the twenty-first century. *Health Educ*. 2008;108(2):101-4.
  22. Wu A, Begoray D, Macdonald M, Wharf Higgins J, Frankish J, Kwan B, et al. Developing and evaluating a relevant and feasible instrument for measuring health literacy of Canadian high school students. *Health Promot Int*. 2010;25(4):444-52.
  23. Ormshaw MJ, Paakkari LT, Kannas LK. Measuring child and adolescent health literacy: a systematic review of literature. *Health Educ*. 2013;113(5):433-55.
  24. National Institutes of Health (NIH). Office of Behavior and Social Sciences Research. Research Underway in Health Literacy Supported by NIH. 2014. Bethesda, Maryland: NIH; 2014 [cited 2014 Mar 3]; Available: [https://obssr-archive.od.nih.gov/scientific\\_areas/social\\_culture\\_factors\\_in\\_health/health\\_literacy/research-underway-health.aspx](https://obssr-archive.od.nih.gov/scientific_areas/social_culture_factors_in_health/health_literacy/research-underway-health.aspx).
  25. Mokkink LB, Terwee CB, Patrick DL, Alonso J, Stratford PW, Knol DL, et al. The COSMIN checklist for assessing the methodological quality of studies on measurement properties of health status measurement instruments: an international Delphi study. *Quality of life research : an international journal of quality of life aspects of treatment, care and rehabilitation*. 2010;19(4):539-49
  26. Mokkink LB, Terwee CB, Patrick DL, Alonso J, Stratford PW, Knol DL, et al. The COSMIN study reached international consensus on taxonomy, terminology, and definitions of measurement properties for health-related patient-reported outcomes. *J Clin Epidemiol*. 2010;63(7):737-45.
  27. World Health Organization. Health topics: Adolescent health. Geneva, Switzerland: WHO; 2014 [cited 2014 Mar 7]; Available from: [http://www.who.int/topics/adolescent\\_health/en/](http://www.who.int/topics/adolescent_health/en/).
  28. World Health Organization Media Centre. Young people: health risks and solutions, Fact sheet N°345. Geneva, Switzerland: WHO Media Centre; 2014 [cited 2014 Mar 7]; Available: <http://www.who.int/mediacentre/factsheets/fs345/en/>.
  29. Erikson EH. *Childhood and society*. 2nd ed. New York, USA: W. W. Norton & Company; 1963.
  30. Jordan JE, Osborne RH, Buchbinder R. Critical appraisal of health literacy indices revealed variable underlying constructs, narrow content and psychometric weaknesses. *J Clin Epidemiol*. 2011;64(4):366-79.
  31. Berkman ND, Sheridan SL, Donahue KE, Halpern DJ, Crotty K. Low health literacy and health outcomes: an updated systematic review. *Ann Intern Med*. 2011;155(2):97-107.
  32. Sanders LM, Federico S, Klass P, Abrams MA, Dreyer B. Literacy and child health: a systematic review. *Arch Pediatr Adolesc Med* 2009;163(2):131-40.
  33. DeWalt DA, Hink A. Health literacy and child health outcomes: a systematic review of the literature. *Pediatrics*. 2009;124(Supplement 3):S265-S74.
  34. Higgins JP, Green S. *Cochrane Handbook for Systematic Reviews of Interventions Version 5.1. 0* [updated Mar 2011]. London, UK: The Cochrane Collaboration; 2011. Available from: [www.cochrane-handbook.org](http://www.cochrane-handbook.org).
  35. Moher D, Liberati A, Tetzlaff J, Altman DG. Preferred reporting items for systematic reviews and meta-analyses: the PRISMA statement. *Ann Intern Med*. 2009;151(4):264-9.
  36. Terwee CB, Mokkink LB, Knol DL, Ostelo RW, Bouter LM, de Vet HC. Rating the methodological quality in systematic reviews of studies on measurement properties: a scoring system for the COSMIN checklist. *Quality of life research : an international journal of quality of life aspects of treatment, care and rehabilitation*. 2012;21(4):651-7.
  37. Lohr KN. Assessing health status and quality-of-life instruments: attributes and review criteria. *Quality of life research : an international journal of quality of life aspects of treatment, care and rehabilitation*. 2002;11(3):193-205.
  38. Terwee CB, Bot SD, de Boer MR, van der Windt DA, Knol DL, Dekker J, et al. Quality criteria were proposed for measurement properties of health status questionnaires. *J Clin Epidemiol*. 2007;60(1):34-42.

39. Furlan AD, Pennick V, Bombardier C, van Tulder M. 2009 updated method guidelines for systematic reviews in the Cochrane Back Review Group. *Spine*. 2009;34(18):1929-41.
40. Van Tulder, M, Furlan, A, Bombardier, C, Bouter, L, Editorial Board of the Cochrane Collaboration Back Review Group. Updated method guidelines for systematic reviews in the cochrane collaboration back review group. *Spine*. 2003;28(12):1290-9.

## Appendix 2. Search strategy for seven databases

This section has two parts for SEARCH STRATEGY. The first part focuses on the timeline of 1974 to 2014. The second part focuses on the timeline of May 2014 to Jan 2018.

### Part 1:

#### 1 MEDLINE (Web of Science) search strategy

MEDLINE database was searched using the Web of Science interface on 16/05/2014 for the period 1974 to 2014.

Basic search:

| Set | Results      |                                                                                                                                                                                                                                                                                                                                                                                                                                 |
|-----|--------------|---------------------------------------------------------------------------------------------------------------------------------------------------------------------------------------------------------------------------------------------------------------------------------------------------------------------------------------------------------------------------------------------------------------------------------|
| # 1 | <u>500</u>   | MeSH HEADING: (health literacy) OR ((TITLE: (health literacy) OR MeSH HEADING:exp: (Health Literacy)) AND (TITLE: (education) OR MeSH HEADING:exp: (Educational Status) OR MeSH HEADINGS:exp: (/education) OR MeSH HEADING:exp: (Teaching) OR MeSH HEADING:exp: (Educational Status) OR MeSH HEADING:exp: (Education)))<br>Refined by: MeSH HEADINGS: ( ADOLESCENT OR YOUNG ADULT OR CHILD ) Indexes=MEDLINE Timespan=1974-2014 |
| # 2 | <u>3,880</u> | TOPIC: (((health) literacy assess* OR health literacy measur*) OR health literacy evaluat*) OR health literacy instrument*) OR health literacy tool*)<br>Indexes=MEDLINE Timespan=1974-2014                                                                                                                                                                                                                                     |
| # 3 | <u>352</u>   | #2 AND #1<br>Indexes=MEDLINE Timespan=1974-2014                                                                                                                                                                                                                                                                                                                                                                                 |

#### 2 PubMed search strategy

PubMed database was searched (Advanced search) on 16/05/2014 for the period 1974 to 16/05/2014.

| Set | Results        |                                                                                                                                                                                                                                                                                                                                                                                                                                            |
|-----|----------------|--------------------------------------------------------------------------------------------------------------------------------------------------------------------------------------------------------------------------------------------------------------------------------------------------------------------------------------------------------------------------------------------------------------------------------------------|
| # 1 | <u>4910</u>    | Search (health literacy[MeSH Terms]) OR (health AND education AND literacy[Title/Abstract]) Sort by: PublicationDate                                                                                                                                                                                                                                                                                                                       |
| # 2 | <u>3248385</u> | Search (child* OR adolescent* OR student* OR youth OR young people OR teen* OR young adult[Title/Abstract]) Sort by: PublicationDate<br>Because if we select age group including child, adolescent, and young adult, the newest papers such as published in 2014 will not be included, the reason maybe the database doesn't update properly. So we use these terms to identify.                                                           |
| # 3 | <u>1887</u>    | Search (health literacy assess* OR health literacy measur* OR health literacy evaluat* OR health literacy instrument* OR health literacy tool*) Sort by: PublicationDate                                                                                                                                                                                                                                                                   |
| # 4 | <u>581</u>     | Search (((health literacy[MeSH Terms]) OR (health AND education AND literacy[Title/Abstract]))) AND ((health literacy assess* OR health literacy measur* OR health literacy evaluat* OR health literacy instrument* OR health literacy tool*)) AND ((child* OR adolescent* OR student* OR youth OR young people OR teen* OR young adult[Title/Abstract])) Filters: Publication date from 1974/01/01 to 2014/05/16 Sort by: PublicationDate |

### 3 EMBASE (Ovid) search strategy

EMBASE database was searched using Ovid interface on 16/05/2014 for the period 1974 to current.

Using .mp as searching terms (Advanced Search):

| Set | Results     |                                                                                                                                              |
|-----|-------------|----------------------------------------------------------------------------------------------------------------------------------------------|
| #1  | <u>6060</u> | ("health literacy" or (health and literacy and education)).mp.                                                                               |
| #2  | <u>6043</u> | limit 1 to yr="1974 -Current"                                                                                                                |
| #3  | <u>671</u>  | limit 2 to (school child <7 to 12 years> or adolescent <13 to 17 years>)                                                                     |
| #4  | <u>170</u>  | (health literacy assess* or health literacy measur* or health literacy evaluat* or health literacy instrument* or health literacy tool*).mp. |
| #5  | <u>170</u>  | limit 4 to yr="1974 -Current"                                                                                                                |
| #6  | <u>18</u>   | 3 and 5                                                                                                                                      |

### 4 PsycINFO (EBSCO) search strategy

PsycINFO database was searched using EBSCO interface on 16/05/2014 for the period January 1974 to May 2014.

Advanced Search:

| Set | Results    |                                                                                                                                                          |                                                                                                                                                                            |
|-----|------------|----------------------------------------------------------------------------------------------------------------------------------------------------------|----------------------------------------------------------------------------------------------------------------------------------------------------------------------------|
| #1  | <u>786</u> | health literacy OR (health AND literacy AND education)                                                                                                   | Limiters - Published Date: 19740101-20140531; Age Groups: School Age (6-12 yrs), Adolescence (13-17 yrs), Young Adulthood (18-29 yrs)<br><br>Search modes - Boolean/Phrase |
| #2  | <u>133</u> | health literacy assess* or health literacy measur* or health literacy evaluat* or health literacy instrument* or health literacy tool*                   | Limiters - Published Date: 19740101-20140531; Age Groups: School Age (6-12 yrs), Adolescence (13-17 yrs), Young Adulthood (18-29 yrs)<br><br>Search modes - Boolean/Phrase |
| #3  | <u>133</u> | (health literacy assess* or health literacy measur* or health literacy evaluat* or health literacy instrument* or health literacy tool*) AND (S1 AND S2) | Search modes - Boolean/Phrase                                                                                                                                              |

## 5 CINAHL (EBSCO) search strategy

CINAHL database was searched using EBSCO interface on 16/05/2014 for the period January 1974 to May 2014.

Advanced Search:

| Set | Results    |                                                                                                                                                          |                                                                                                                                       |
|-----|------------|----------------------------------------------------------------------------------------------------------------------------------------------------------|---------------------------------------------------------------------------------------------------------------------------------------|
| #1  | <u>437</u> | health literacy OR ( health AND education AND literacy )                                                                                                 | Limiters - Published Date: 19740101-20140531; Age Groups: Child: 6-12 years, Adolescent: 13-18 years<br>Search modes - Boolean/Phrase |
| #2  | <u>63</u>  | health literacy assess* or health literacy measur* or health literacy evaluat* or health literacy instrument* or health literacy tool*                   | Limiters - Published Date: 19740101-20140531; Age Groups: Child: 6-12 years, Adolescent: 13-18 years<br>Search modes - Boolean/Phrase |
| #3  | <u>63</u>  | (health literacy assess* or health literacy measur* or health literacy evaluat* or health literacy instrument* or health literacy tool*) AND (S1 AND S2) | Search modes - Boolean/Phrase                                                                                                         |

## 6 ERIC (EBSCO) search strategy

ERIC database was searched using EBSCO interface on 16/05/2014 for the period January 1974 to May 2014.

Advanced Search:

| Set | Results      |                                                                                                                                        |                                                                               |
|-----|--------------|----------------------------------------------------------------------------------------------------------------------------------------|-------------------------------------------------------------------------------|
| #1  | <u>59</u>    | health literacy assess* or health literacy measur* or health literacy evaluat* or health literacy instrument* or health literacy tool* | Limiters - Date Published: 19740101-20140531<br>Search modes - Boolean/Phrase |
| #2  | <u>2,250</u> | health literacy OR ( health AND education AND literacy )                                                                               | Limiters - Date Published: 19740101-20140531<br>Search modes - Boolean/Phrase |
| #3  | <u>59</u>    | S1 AND S2                                                                                                                              | Search modes - Boolean/Phrase                                                 |

## 7 The Cochrane Library search strategy

The Cochrane Library database was searched on 30/05/2014 for the period January 1974 to May 2014.

| Set | Results    | Sub-database                                                                                                                                                                                                                                                                                                                                                                                                                                                                      |
|-----|------------|-----------------------------------------------------------------------------------------------------------------------------------------------------------------------------------------------------------------------------------------------------------------------------------------------------------------------------------------------------------------------------------------------------------------------------------------------------------------------------------|
| #1  | <u>4</u>   | Cochrane Reviews:<br>There are 4 results from 8483 records for your search on 'health literacy in Title, Abstract, Keywords and child* OR adolescent* OR student* OR teen* OR youth OR young adult OR young people in Title, Abstract, Keywords and health literacy assess* or health literacy measur* or health literacy evaluat* or health literacy instrument* or health literacy tool* in Title, Abstract, Keywords , Publication Date from 1974 to 2014 in Cochrane Reviews' |
| #2  | <u>114</u> | Trials:<br>There are 114 results from 789657 records for your search on 'health literacy in Title, Abstract, Keywords and child* OR adolescent* OR student* OR teen* OR youth OR young adult OR young people in Title, Abstract, Keywords and health literacy assess* or health literacy measur* or health literacy evaluat* or health literacy instrument* or health literacy tool* in Title, Abstract, Keywords , Publication Date from 1974 to 2014 in Trials'                 |
| #3  | <u>2</u>   | Methods Studies:<br>There are 2 results from 15764 records for your search on 'health literacy in Title, Abstract, Keywords and child* OR adolescent* OR student* OR teen* OR youth OR young adult OR young people in Title, Abstract, Keywords and health literacy assess* or health literacy measur* or health literacy evaluat* or health literacy instrument* or health literacy tool* in Title, Abstract, Keywords , Publication Date from 1974 to 2014 in Methods Studies'  |
| #4  | <u>120</u> |                                                                                                                                                                                                                                                                                                                                                                                                                                                                                   |

## PART 2:

The above seven databases were searched using similar rationale as describe before for the timeframe of May 17 2014 to Jan 31 2018.

**MEDLINE** was searched using the Web of Science interface on 17/02/2018 for the period 2014 to 2018.

Basic search:

| Set | Results       |                                                                                                                                                                                                                               |
|-----|---------------|-------------------------------------------------------------------------------------------------------------------------------------------------------------------------------------------------------------------------------|
| # 5 | <u>35</u>     | #4 AND #3<br>Indexes=MEDLINE Timespan=2014-2018                                                                                                                                                                               |
| # 4 | <u>14,198</u> | MeSH MAJOR TOPIC:exp: ((((((child*) OR adolescent*) OR student*) OR youth) OR young people) OR teen*) OR young adult)<br>Indexes=MEDLINE Timespan=2014-2018                                                                   |
| # 3 | <u>1,779</u>  | #2 AND #1<br>Indexes=MEDLINE Timespan=2014-2018                                                                                                                                                                               |
| # 2 | <u>3,482</u>  | (((TOPIC: (health literacy assess*) OR TOPIC: (health literacy measur*) OR TOPIC: (health literacy instrument*) OR TOPIC: (health literacy tool*) OR TOPIC: (health literacy evaluat*))<br>Indexes=MEDLINE Timespan=2014-2018 |
| # 1 | <u>2,654</u>  | ((MeSH HEADING:exp: (health literacy) OR MeSH MAJOR TOPIC:exp: (health literacy)) OR TITLE: (health literacy)) OR MeSH MAJOR TOPIC: ((health) AND education) AND literacy<br>Indexes=MEDLINE Timespan=2014-2018               |

**Pubmed** was searched (Advanced search) on 17/02/2018 for the period 2014 to 31/01/2018.

| Set | Results        |                                                                                                                                                                                                                                                                                                                                                                                                                                                                                                                                                                                                                                                                                                                                                                   |
|-----|----------------|-------------------------------------------------------------------------------------------------------------------------------------------------------------------------------------------------------------------------------------------------------------------------------------------------------------------------------------------------------------------------------------------------------------------------------------------------------------------------------------------------------------------------------------------------------------------------------------------------------------------------------------------------------------------------------------------------------------------------------------------------------------------|
| #6  | <u>26</u>      | Search (((((((health literacy[MeSH Terms]) OR health literacy[Title/Abstract]) OR (health[Title/Abstract] AND education[Title/Abstract] AND literacy[Title/Abstract])) OR (health[Title/Abstract] AND education[Title/Abstract] AND numeracy[Title/Abstract]))) AND ((health literacy assess*[Title/Abstract] OR health literacy measur*[Title/Abstract] OR health literacy evaluat*[Title/Abstract] OR health literacy instrument*[Title/Abstract] OR health literacy tool*[Title/Abstract]))) AND ((child*[Title/Abstract] OR adolescent*[Title/Abstract] OR student*[Title/Abstract] OR youth[Title/Abstract] OR young people[Title/Abstract] OR teen*[Title/Abstract] OR young adult[Title/Abstract])) Filters:Publication date from 2014/05/16 to 2018/01/31 |
| #5  | <u>48</u>      | Search (((((((health literacy[MeSH Terms]) OR health literacy[Title/Abstract]) OR (health[Title/Abstract] AND education[Title/Abstract] AND literacy[Title/Abstract])) OR (health[Title/Abstract] AND education[Title/Abstract] AND numeracy[Title/Abstract]))) AND ((health literacy assess*[Title/Abstract] OR health literacy measur*[Title/Abstract] OR health literacy evaluat*[Title/Abstract] OR health literacy instrument*[Title/Abstract] OR health literacy tool*[Title/Abstract]))) AND ((child*[Title/Abstract] OR adolescent*[Title/Abstract] OR student*[Title/Abstract] OR youth[Title/Abstract] OR young people[Title/Abstract] OR teen*[Title/Abstract] OR young adult[Title/Abstract]))                                                        |
| #4  | <u>288</u>     | Search (((((((health literacy[MeSH Terms]) OR health literacy[Title/Abstract]) OR (health[Title/Abstract] AND education[Title/Abstract] AND literacy[Title/Abstract])) OR (health[Title/Abstract] AND education[Title/Abstract] AND numeracy[Title/Abstract]))) AND ((health literacy assess*[Title/Abstract] OR health literacy measur*[Title/Abstract] OR health literacy evaluat*[Title/Abstract] OR health literacy instrument*[Title/Abstract] OR health literacy tool*[Title/Abstract]))                                                                                                                                                                                                                                                                    |
| #3  | <u>288</u>     | Search (health literacy assess*[Title/Abstract] OR health literacy measur*[Title/Abstract] OR health literacy evaluat*[Title/Abstract] OR health literacy instrument*[Title/Abstract] OR health literacy tool*[Title/Abstract])                                                                                                                                                                                                                                                                                                                                                                                                                                                                                                                                   |
| #2  | <u>1636528</u> | Search (child*[Title/Abstract] OR adolescent*[Title/Abstract] OR student*[Title/Abstract] OR youth[Title/Abstract] OR young people[Title/Abstract] OR teen*[Title/Abstract] OR young adult[Title/Abstract])                                                                                                                                                                                                                                                                                                                                                                                                                                                                                                                                                       |
| #1  | <u>8495</u>    | Search (((health literacy[MeSH Terms]) OR health literacy[Title/Abstract]) OR (health[Title/Abstract] AND education[Title/Abstract] AND literacy[Title/Abstract])) OR (health[Title/Abstract] AND education[Title/Abstract] AND numeracy[Title/Abstract])                                                                                                                                                                                                                                                                                                                                                                                                                                                                                                         |

**EMBASE** was searched using Ovid interface on 17/02/2018 for the period 2014 to current.

Using **.mp** as searching terms (Basic Search):

| Set | Results   |                                                                                                                                              |
|-----|-----------|----------------------------------------------------------------------------------------------------------------------------------------------|
| #1  | 11966     | ("health literacy" or (health and literacy and education)).mp.                                                                               |
| #2  | 5862      | limit 1 to yr="2014 -Current"                                                                                                                |
| #3  | 639       | limit 2 to (school child <7 to 12 years> or adolescent <13 to 17 years>)                                                                     |
| #4  | 372       | (health literacy assess* or health literacy measur* or health literacy evaluat* or health literacy instrument* or health literacy tool*).mp. |
| #5  | <b>26</b> | 3 and 4                                                                                                                                      |

**PsycINFO** was searched using Ovid interface on 17/02/2018 for the period May 2014 to Jan 2018.

Basic Search:

| Set | Results     |                                                                                                                                                                      |
|-----|-------------|----------------------------------------------------------------------------------------------------------------------------------------------------------------------|
| #1  | 4331        | ("health literacy" or (health and literacy and education)).mp.                                                                                                       |
| #2  | <u>2077</u> | limit 1 to yr="2014 -Current"                                                                                                                                        |
| #3  | 754         | limit 2 to (100 childhood <birth to age 12 yrs> or 180 school age <age 6 to 12 yrs> or 200 adolescence <age 13 to 17 yrs> or 320 young adulthood <age 18 to 29 yrs>) |
| #4  | 216         | (health literacy assess* or health literacy measur* or health literacy evaluat* or health literacy instrument* or health literacy tool*).mp.                         |
| #5  | <b>40</b>   | 3 and 4                                                                                                                                                              |

**CINAHL** was searched using EBSCO interface on 17/02/2018 for the period May 2014 to Jan 2018.

Basic Search:

| Set | Results                                                                                                                                |                                                                                                                                       |                    |
|-----|----------------------------------------------------------------------------------------------------------------------------------------|---------------------------------------------------------------------------------------------------------------------------------------|--------------------|
| S1  | health literacy OR ( ( health AND education AND literacy) )                                                                            | Limiters - Published Date: 20140501-20180131; Age Groups: Child: 6-12 years, Adolescent: 13-18 years<br>Search modes - Boolean/Phrase | View Results (467) |
| S2  | health literacy assess* or health literacy measur* or health literacy evaluat* or health literacy instrument* or health literacy tool* | Limiters - Published Date: 20140501-20180131; Age Groups: Child: 6-12 years, Adolescent: 13-18 years<br>Search modes - Boolean/Phrase | View Results (118) |
| S3  | S1 AND S2                                                                                                                              | Search modes - Boolean/Phrase                                                                                                         | View Results (118) |

**ERIC** was searched using EBSCO interface on 17/02/2018 for the period May 2014 to Jan 2018.

Basic Search:

| Set | Results                                                                                                                                |                                                                               |                    |
|-----|----------------------------------------------------------------------------------------------------------------------------------------|-------------------------------------------------------------------------------|--------------------|
| S1  | health literacy OR ( ( health AND education AND literacy) )                                                                            | Limiters - Date Published: 20140501-20180131<br>Search modes - Boolean/Phrase | View Results (292) |
| S2  | health literacy assess* or health literacy measur* or health literacy evaluat* or health literacy instrument* or health literacy tool* | Limiters - Date Published: 20140501-20180131<br>Search modes - Boolean/Phrase | View Results (13)  |
| S3  | (S1 AND S2)                                                                                                                            | Search modes - Boolean/Phrase                                                 | View Results (13)  |

**Cochrane Library** was searched on 17/02/2018 for the period May 2014 to Jan 2018.

| Set | Results    | Sub-database                                                                                                                                                                                                                                                                                                                                                                                                                                                                       |
|-----|------------|------------------------------------------------------------------------------------------------------------------------------------------------------------------------------------------------------------------------------------------------------------------------------------------------------------------------------------------------------------------------------------------------------------------------------------------------------------------------------------|
| #1  | <u>2</u>   | Cochrane Reviews:<br>There are 2 results from 10210 records for your search on 'health literacy in Title, Abstract, Keywords and child* OR adolescent* OR student* OR teen* OR youth OR young adult OR young people in Title, Abstract, Keywords and health literacy assess* or health literacy measur* or health literacy evaluat* or health literacy instrument* or health literacy tool* in Title, Abstract, Keywords , Publication Year from 2014 to 2018 in Cochrane Reviews' |
| #2  | <u>199</u> | Trials:<br>There are 199 results from 1121096 records for your search on 'health literacy in Title, Abstract, Keywords and child* OR adolescent* OR student* OR teen* OR youth OR young adult OR young people in Title, Abstract, Keywords and health literacy assess* or health literacy measur* or health literacy evaluat* or health literacy instrument* or health literacy tool* in Title, Abstract, Keywords , Publication Year from 2014 to 2018 in Trials'                 |
| #3  | 201        |                                                                                                                                                                                                                                                                                                                                                                                                                                                                                    |

### Appendix 3. Quality criteria for measurement properties of health literacy instruments

| Property                                  | Rating | Quality criteria                                                                                                                                                                                                                                    |
|-------------------------------------------|--------|-----------------------------------------------------------------------------------------------------------------------------------------------------------------------------------------------------------------------------------------------------|
| <b>Reliability</b>                        |        |                                                                                                                                                                                                                                                     |
| Internal consistency                      | +      | (Sub)scale unidimensional AND Cronbach's alpha(s) $\geq 0.70$                                                                                                                                                                                       |
|                                           | ?      | Dimensionality not known OR Cronbach's alpha not determined                                                                                                                                                                                         |
|                                           | -      | (Sub)scale not unidimensional OR Cronbach's alpha(s) $< 0.70$                                                                                                                                                                                       |
| Measurement error                         | +      | MIC > SDC OR MIC outside the LOA                                                                                                                                                                                                                    |
|                                           | ?      | MIC not defined                                                                                                                                                                                                                                     |
|                                           | -      | MIC $\leq$ SDC OR MIC equals or inside LOA                                                                                                                                                                                                          |
| Reliability                               | +      | ICC/weighted Kappa $\geq 0.70$ OR Pearson's r $\geq 0.80$                                                                                                                                                                                           |
|                                           | ?      | Neither ICC/weighted Kappa nor Pearson's r determined                                                                                                                                                                                               |
|                                           | -      | ICC/weighted Kappa $< 0.70$ OR Pearson's r $< 0.80$                                                                                                                                                                                                 |
| <b>Validity</b>                           |        |                                                                                                                                                                                                                                                     |
| Content validity                          | +      | The target population considers all items in the questionnaire to be relevant AND considers the questionnaire to be complete                                                                                                                        |
|                                           | ?      | No target population involvement                                                                                                                                                                                                                    |
|                                           | -      | The target population considers items in the questionnaire to be irrelevant OR considers the questionnaire to be incomplete                                                                                                                         |
| Construct validity<br>Structural validity | +      | Factors should explain at least 50% of the variance                                                                                                                                                                                                 |
|                                           | ?      | Explained variance not mentioned                                                                                                                                                                                                                    |
|                                           | -      | Factors explain $< 50\%$ of the variance                                                                                                                                                                                                            |
| Hypotheses testing                        | +      | (Correlation with an instrument measuring the same construct $\geq 0.50$ OR at least 75% of the results are in accordance with the hypotheses) AND correlation with related constructs is higher than with unrelated constructs                     |
|                                           | ?      | Solely correlations determined with unrelated constructs                                                                                                                                                                                            |
|                                           | -      | Correlation with an instrument measuring the same construct $< 0.50$ OR $< 75\%$ of the results are in accordance with the hypotheses OR correlation with related constructs is lower than with unrelated constructs                                |
| <b>Responsiveness</b>                     |        |                                                                                                                                                                                                                                                     |
| Responsiveness                            | +      | (Correlation with an instrument measuring the same construct $\geq 0.50$ OR at least 75% of the results are in accordance with the hypotheses OR AUC $\geq 0.70$ ) AND correlation with related constructs is higher than with unrelated constructs |
|                                           | ?      | Solely correlations determined with unrelated constructs                                                                                                                                                                                            |
|                                           | -      | Correlation with an instrument measuring the same construct $< 0.50$ OR $< 75\%$ of the results are in accordance with the hypotheses OR AUC $< 0.70$ OR correlation with related constructs is lower than with unrelated constructs                |

Note: AUC, Area Under the Curve; ICC, Intra-class Correlation Coefficient; LOA, Limits of Agreement; MIC, Minimal Important Change; SDC, Smallest Detectable Change. + positive rating; ? indeterminate rating; - negative rating.

#### Appendix 4. Levels of evidence for the overall rating of measurement properties

| Level       | Rating     | Criteria                                                                                                                   |
|-------------|------------|----------------------------------------------------------------------------------------------------------------------------|
| Strong      | +++ or --- | Consistent findings in multiple studies of good methodological quality OR in one study of excellent methodological quality |
| Moderate    | ++ or --   | Consistent findings in multiple studies of fair methodological quality OR in one study of good methodological quality      |
| Limited     | + or -     | One study of fair methodological quality                                                                                   |
| Conflicting | ±          | Conflicting findings                                                                                                       |
| Unknown     | ?          | Only studies of poor methodological quality                                                                                |

Note: + positive result; - negative result; ±conflicting result; ? unknown result.

## Appendix 5: Reliability and validity results for included instruments

Appendix Table 1. The methodological quality of each study based on reliability for each health literacy instrument

| Instrument                                | Internal consistency                                                                                   |              | Reliability                                           |             |               |              |
|-------------------------------------------|--------------------------------------------------------------------------------------------------------|--------------|-------------------------------------------------------|-------------|---------------|--------------|
|                                           | Result                                                                                                 | COSMIN score | Result                                                | Design      | Time interval | COSMIN score |
| NVS (Warsh <i>et al.</i> , 2014)          | na                                                                                                     | na           | na                                                    | na          | na            | na           |
| NVS (Driessnack <i>et al.</i> , 2014)     | $\alpha=0.71$ (n=47)                                                                                   | Poor         | na                                                    | na          | na            | na           |
| NVS (Hoffman <i>et al.</i> , 2013)        | $\alpha=0.67$ (n=229)                                                                                  | Poor         | na                                                    | na          | na            | na           |
| c-sTOFHLAd (Chang <i>et al.</i> , 2012)   | $\alpha=0.85$ (n=300)<br>Item-total correlation=0.44-0.86                                              | Fair         | Correlation of test and retest was 0.95 ( $P<0.001$ ) | Test-retest | 1 week        | Fair         |
| TOFHLA (Chisolm and Buchanan, 2007)       | na                                                                                                     | na           | na                                                    | na          | na            | na           |
| s-TOFHLA (Hoffman <i>et al.</i> , 2013)   | $\alpha=0.89$ (n=229)                                                                                  | Poor         | na                                                    | na          | na            | na           |
| REALM-Teen (Davis <i>et al.</i> , 2006)   | $\alpha=0.94$ (n=388)                                                                                  | Poor         | $\gamma=0.98$                                         | Test-retest | 1 week        | Fair         |
| REALM-Teen (Hoffman <i>et al.</i> , 2013) | $\alpha=0.92$ (n=229)                                                                                  | Poor         | na                                                    | na          | na            | na           |
| HLAB (Wu <i>et al.</i> , 2010)            | $\alpha=0.92$ (n=275)<br>Understanding $\alpha=0.88$ (n=275)<br>Evaluating $\alpha=0.82$ (n=275)       | Fair         | Concordance rate=95%                                  | Inter-rater | na            | Poor         |
| MMAHL(Massey <i>et al.</i> , 2013)        | $\alpha=0.83$ (n=1208)<br>Item-total correlation=0.39-0.74                                             | Good         | na                                                    | na          | na            | na           |
| MHL (Levin-Zamir <i>et al.</i> , 2011)    | $\alpha=0.74$ (n=1316)<br>Coefficient of reproducibility=0.84<br>Coefficients of scalability=0.54-0.80 | Poor         | na                                                    | na          | na            | na           |
| DNT-39 (Mulvaney <i>et al.</i> , 2013)    | $\alpha=0.93$ (n=61)                                                                                   | Fair         | na                                                    | na          | na            | na           |
| DNT-14 (Mulvaney <i>et al.</i> , 2013)    | $\alpha=0.82$ (n=133)<br>$\alpha=0.80$ (n=61)                                                          | Fair         | na                                                    | na          | na            | na           |

| Instrument                                  | Internal consistency                                                                                                                                            |              | Reliability                                                                                                                                                     |             |                                                      |              |
|---------------------------------------------|-----------------------------------------------------------------------------------------------------------------------------------------------------------------|--------------|-----------------------------------------------------------------------------------------------------------------------------------------------------------------|-------------|------------------------------------------------------|--------------|
|                                             | Result                                                                                                                                                          | COSMIN score | Result                                                                                                                                                          | Design      | Time interval                                        | COSMIN score |
| eHEALS (Norman and Skinner, 2006)           | $\alpha=0.83$ (n=72)<br>$\alpha=0.88$ (n=664)<br>Item-scale correlation coefficient=0.51-0.76                                                                   | Fair         | The correlations between administrations ranged 0.68-0.40.                                                                                                      | Test-retest | Immediately after the intervention; 3-month; 6-month | Fair         |
| CHC Test (Steckelberg <i>et al.</i> , 2009) | na                                                                                                                                                              | na           | Cohen's Kappa was excellent for 277 ratings ( $\kappa=0.9-1.0$ ), moderate or good for 31 ratings ( $\kappa=0.7-0.89$ ) and poor for 5 ratings ( $\kappa<0.7$ ) | Inter-rater | na                                                   | Poor         |
| HKACSS (Schmidt <i>et al.</i> , 2010)       | Health knowledge $\chi^2=6.45$ , $P=0.17$ (n=852)<br>Health communication $\alpha=0.73$ (n=852)<br>Health attitudes $\alpha=0.57$ (n=852)                       | Excellent    | na                                                                                                                                                              | na          | na                                                   | na           |
| HLAT-51 (Harper, 2014)                      | Goodness of fit statistic was calculated by each domain (CFI=0.33-0.88; TLI=0.66-0.84; RMSEA=0.09-0.17). The internal consistency statistic was not calculated. | Poor         | na                                                                                                                                                              | na          | na                                                   | na           |
| HLAT-8 (Abel <i>et al.</i> , 2014)          | $\alpha=0.64$ (n=7097 for male)<br>$\alpha=0.65$ (n=331 for female)                                                                                             | Excellent    | na                                                                                                                                                              | na          | na                                                   | na           |
| CHLT (Liu <i>et al.</i> , 2014)             | $\alpha=0.87$ (the entire scale); subscales $\alpha$ ranged 0.59 to 0.81                                                                                        | Fair         | na                                                                                                                                                              | na          | na                                                   | na           |
| VOHL (Ueno <i>et al.</i> , 2014)            | na                                                                                                                                                              | na           | The kappa value of scoring among the dentists ranged from 0.60 tooth score to 0.70 for gingiva score.                                                           | Inter-rater | na                                                   | Fair         |
| HAS-A (Manganello <i>et al.</i> , 2015)     | $\alpha=0.77$ (communication)<br>$\alpha=0.73$ (confusion)<br>$\alpha=0.76$ (understanding)                                                                     | Fair         | na                                                                                                                                                              | na          | na                                                   | na           |
| MaHeLi (Naigaga <i>et al.</i> 2015)         | The person separation index for the original 20-item scale was 0.91 and $\alpha=0.92$ . After                                                                   | Fair         | na                                                                                                                                                              | na          | na                                                   | na           |

| Instrument                                            | Internal consistency                                                                                           |              | Reliability                                      |             |               |              |
|-------------------------------------------------------|----------------------------------------------------------------------------------------------------------------|--------------|--------------------------------------------------|-------------|---------------|--------------|
|                                                       | Result                                                                                                         | COSMIN score | Result                                           | Design      | Time interval | COSMIN score |
|                                                       | item reduction, the person separation index for 12-item scale was 0.90.                                        |              |                                                  |             |               |              |
| QuALiSMental (de Jesus Loureiro <i>et al.</i> , 2015) | $\alpha=0.55-0.72$ (component 2 and 3)<br>$\alpha=0.44-0.59$ (component 4)<br>$\alpha=0.60-0.82$ (component 5) | Fair         | na                                               | na          | na            | na           |
| FCCHL-AYAC (McDonald <i>et al.</i> , 2016)            | $\alpha=0.73$ (FHL)<br>$\alpha=0.63$ (IHL)<br>$\alpha=0.85$ (CHL)                                              | Fair         | na                                               | na          | na            | na           |
| ICHL (Smith <i>et al.</i> , 2016)                     | na                                                                                                             | na           | na                                               | na          | na            | na           |
| HELMA (Ghanbari <i>et al.</i> , 2016)                 | $\alpha=0.93$ (the entire scale); subscales $\alpha$ ranged 0.61 to 0.89                                       | Good         | The intraclass correlation coefficient was 0.93. | Test-retest | Two weeks     | Good         |
| HLSAC (Paakkari <i>et al.</i> , 2016)                 | $\alpha=0.93$ (the entire scale); subscales $\alpha$ ranged 0.69 to 0.77                                       | Fair         | The standardised stability estimate was 0.83.    | Test-retest | Two weeks     | Fair         |
| REALM-TeenS (Manganello <i>et al.</i> , 2017)         | $\alpha=0.82$                                                                                                  | Good         | na                                               | na          | na            | na           |
| funHLS-YA (Tsubakita <i>et al.</i> , 2017)            | $\alpha=0.75$                                                                                                  | Fair         | na                                               | na          | na            | na           |
| HLS-TCO (Intarakamhang <i>et al.</i> , 2017)          | $\alpha=0.70-0.82$ for five subscales; KR-20=0.76 for health knowledge scale                                   | Fair         | na                                               | na          | na            | na           |
| HLRS-Y (Bradley-Klug <i>et al.</i> , 2017)            | $\alpha=0.88$ (Knowledge)<br>$\alpha=0.94$ (Self-advocacy/support)<br>$\alpha=0.93$ (Resiliency)               | Fair         | na                                               | na          | na            | na           |
| p_HLAT-8 (Quemelo <i>et al.</i> , 2017)               | $\alpha=0.74$ (the entire scale), subscales $\alpha$ ranged 0.41 to 0.71                                       | Fair         | na                                               | na          | na            | na           |

Note: na, no information available. CFI, Comparative Fit Index; CHC Test, the Critical Health Competence Test; CHL, Critical Health Literacy; CHLT, Child Health Literacy Test; c-sTOFHLAd, the Chinese version of short-form Test of Functional Health Literacy in Adolescents; DNT, the Diabetes Numeracy Test; eHEALS, the eHealth Literacy Scale; FCCHL-AYAC, the Functional, Communicative, and Critical Health Literacy-Adolescents and Young Adults Cancer; FHL, Functional Health Literacy; funHLS-YA, Functional Health

Literacy Scale for Young Adults; HAS-A, the Health Literacy Assessment Scale for Adolescents; HELMA, the Health Literacy Measure for Adolescents; HKACSS, the Health Knowledge, Attitudes, Communication and Self-efficacy Scale; HLAB, Health Literacy Assessment Booklet; HLAT-8, the 8-item Health Literacy Assessment Tool; HLAT-51, the 51-item Health Literacy Assessment Tool; HLRS-Y, Health Literacy and Resiliency Scale: Youth Version; HLSAC, The Health Literacy for School-aged Children; HLS-TCO, Health Literacy Scale for Thai Childhood Overweight; ICHL, Interactive and Critical Health Literacy; IHL, Interactive Health Literacy; MaHeLi, the Maternal Health Literacy; MHL, the Media Health Literacy; MMAHL, the Multidimensional Measure of Adolescent Health Literacy; NVS, the Newest Vital Sign; p\_HLAT-8, Portuguese version of the 8-item Health Literacy Assessment Tool; QuALiSMental, the Questionnaire for Assessment of Mental Health Literacy; REALM-Teen, the Rapid Estimate of Adolescent Literacy in Medicine; REALM-TeenS, the Rapid Estimate of Adolescent Literacy in Medicine Short Form; RMSEA, Root Mean Square Error of Approximation; s-TOFHLA, the short-form Test of Functional Health Literacy in Adults; TLI, Tucker-Lewis Index; TOFHLA, the Test of Functional Health Literacy in Adults; VOHL, the Visual Oral Health Literacy.

**Appendix Table 2. The methodological quality of each study based on validity for each health literacy instrument**

| Instrument                            | Content validity                                                                                                                                                                                                                    |              | Structural validity |              | Hypotheses-testing                                                                                                                                                                                                                                                                                                                                           |              | Cross-cultural validity |              |
|---------------------------------------|-------------------------------------------------------------------------------------------------------------------------------------------------------------------------------------------------------------------------------------|--------------|---------------------|--------------|--------------------------------------------------------------------------------------------------------------------------------------------------------------------------------------------------------------------------------------------------------------------------------------------------------------------------------------------------------------|--------------|-------------------------|--------------|
|                                       | Results                                                                                                                                                                                                                             | COSMIN score | Results             | COSMIN score | Results                                                                                                                                                                                                                                                                                                                                                      | COSMIN score | Results                 | COSMIN score |
| NVS (Warsh <i>et al.</i> , 2014)      | A panel of health literacy experts developed the NVS according to previous experience. The NVS was then refined after feedback from patients, interviewers, and data analysts. No target population is involved in item generation. | Poor         | na                  | na           | Hypotheses regarding correlation between scores of a comparator instrument of Gray Silent Reading Test (GSRT) and NVS were formulated before data collection. The NVS and GSRT scores were highly correlated ( $\rho=0.71$ , $p<0.0001$ ). The NVS score increased with child age ( $\rho=0.53$ , $p<0.0001$ ).                                              | Fair         | na                      | na           |
| NVS (Driessnack <i>et al.</i> , 2014) | A panel of health literacy experts developed the NVS according to previous experience. The NVS was then refined after feedback from patients, interviewers, and data analysts. No target population is involved in item generation. | Poor         | na                  | na           | A moderate positive correlation was found between children's NVS scores and their age, and between children's NVS scores and their reports of books numbers ( $\gamma_s=0.43$ , $p=0.003$ ; $\gamma_s=0.36$ , $p=0.012$ , respectively), but not found with their parents' report of the number of children's books at home ( $\gamma_s=0.06$ , $p=0.671$ ). | Poor         | na                      | na           |
| NVS (Hoffman <i>et al.</i> , 2013)    | A panel of health literacy experts developed the NVS according to previous experience. The NVS was then refined after feedback from patients, interviewers, and data analysts. No target population is involved in                  | Poor         | na                  | na           | Convergent validity was measured between NVS and the TerraNova academic achievement test, with a correlation coefficient of 0.49 ( $p<0.01$ ).                                                                                                                                                                                                               | Fair         | na                      | na           |

| Instrument                              | Content validity                                                                                                                                                    |              | Structural validity                                                                                                                                                                     |              | Hypotheses-testing                                                                                                                                                                                                                                                                               |              | Cross-cultural validity                                                                                                                                                                                                            |              |
|-----------------------------------------|---------------------------------------------------------------------------------------------------------------------------------------------------------------------|--------------|-----------------------------------------------------------------------------------------------------------------------------------------------------------------------------------------|--------------|--------------------------------------------------------------------------------------------------------------------------------------------------------------------------------------------------------------------------------------------------------------------------------------------------|--------------|------------------------------------------------------------------------------------------------------------------------------------------------------------------------------------------------------------------------------------|--------------|
|                                         | Results                                                                                                                                                             | COSMIN score | Results                                                                                                                                                                                 | COSMIN score | Results                                                                                                                                                                                                                                                                                          | COSMIN score | Results                                                                                                                                                                                                                            | COSMIN score |
|                                         | item generation.                                                                                                                                                    |              |                                                                                                                                                                                         |              |                                                                                                                                                                                                                                                                                                  |              |                                                                                                                                                                                                                                    |              |
| c-sTOFHLAd (Chang <i>et al.</i> , 2012) | The c-sTOFHLAd was translated from the short-version of TOFHLA according to translation procedures and was tested among 30 adolescents to ensure appropriateness.   | Good         | Confirmatory factor analysis was conducted to determine structural validity. One-factor model indicated an acceptable fit to the data according structural equation modelling analysis. | Fair         | Convergent validity was measured between c-sTOFHLAd and the rapid estimate of adult literacy in medicine (REALM), with a correlation coefficient of 0.74 ( $p<0.001$ ).                                                                                                                          | Fair         | Semantic equivalence was measured by the content validity index (CVI). All items were rated by the experts as having a CVI>0.85. Thirty adolescents were chosen to determine and ensure the cultural congruence of the instrument. | Fair         |
| TOFHLA (Chisolm and Buchanan, 2007)     | The TOFHLA was developed from a literacy expert after reviewing commonly used hospital texts and a pilot test. No target population is involved in item generation. | Poor         | na                                                                                                                                                                                      | na           | The reading comprehension component was significantly correlated with the WRAT3 and the REALM ( $\rho=0.59$ , $p<0.001$ ; $\rho=0.60$ , $p<0.001$ respectively), however, no correlation were found with the numeracy component ( $\rho=0.11$ , $p=0.45$ ; $\rho=0.18$ , $p=0.22$ respectively). | Fair         | na                                                                                                                                                                                                                                 | na           |
| s-TOFHLA (Hoffman <i>et al.</i> , 2013) | The s-TOFHLA was developed based on previous data analysis, perceived importance and frequency of the task in the healthcare settings.                              | Poor         | na                                                                                                                                                                                      | na           | Convergent validity was measured between NVS and the TerraNova academic achievement test, with a correlation coefficient of 0.28 ( $p<0.01$ ).                                                                                                                                                   | Fair         | na                                                                                                                                                                                                                                 | na           |
| REALM-Teen (Davis <i>et al.</i> , 2006) | The REALM-Teen was developed based on a preliminary test and a structured interview among adolescents. And a                                                        | Good         | na                                                                                                                                                                                      | na           | Convergent validity was measured between REALM-Teen and the WRAT-3 ( $r=0.83$ ) and SORT-R ( $r=0.93$ ).                                                                                                                                                                                         | Fair         | na                                                                                                                                                                                                                                 | na           |

| Instrument                                | Content validity                                                                                                                                                                |              | Structural validity                                                                                                  |              | Hypotheses-testing                                                                                                                                                                                                                                                                                                                                                                     |              | Cross-cultural validity |              |
|-------------------------------------------|---------------------------------------------------------------------------------------------------------------------------------------------------------------------------------|--------------|----------------------------------------------------------------------------------------------------------------------|--------------|----------------------------------------------------------------------------------------------------------------------------------------------------------------------------------------------------------------------------------------------------------------------------------------------------------------------------------------------------------------------------------------|--------------|-------------------------|--------------|
|                                           | Results                                                                                                                                                                         | COSMIN score | Results                                                                                                              | COSMIN score | Results                                                                                                                                                                                                                                                                                                                                                                                | COSMIN score | Results                 | COSMIN score |
|                                           | panel of experts reviewed the word list.                                                                                                                                        |              |                                                                                                                      |              |                                                                                                                                                                                                                                                                                                                                                                                        |              |                         |              |
| REALM-Teen (Hoffman <i>et al.</i> , 2013) | The REALM-Teen was developed based on a preliminary test and structured interview among adolescents. And a panel of experts reviewed the word list.                             | Poor         | na                                                                                                                   | na           | Convergent validity was measured between NVS and the TerraNova academic achievement test, with a correlation coefficient of 0.40 ( $p < 0.01$ ).                                                                                                                                                                                                                                       | Poor         | na                      | na           |
| HLAB (Wu <i>et al.</i> , 2010)            | Previous experience and literature review were used to develop items; 10 students were pilot-tested for appropriateness of wording, content and format of the final instrument. | Good         | na                                                                                                                   | na           | Correlations were assumed between socio-demographic variables and the overall scores. Socio-demographics of gender, age when came to Canada to live, speaking a language other than English were correlated with the scores of HLAB ( $\beta = -0.18$ , $p = 0.004$ ; $\beta = -0.22$ , $p = 0.014$ ; $\beta = -0.20$ , $p = 0.008$ respectively). No convergent validity is assessed. | Fair         | na                      | na           |
| MMAHL (Massey <i>et al.</i> , 2013)       | Domains were established from literature review and focus group. Items were developed either using adaptation of existing relevant items or created by the research team.       | Good         | Explorative principal components factor analysis was conducted and 49.8% of the variance was accounted by 6 factors. | Good         | na                                                                                                                                                                                                                                                                                                                                                                                     | na           | na                      | na           |
| MHL (Levin-Zamir <i>et al.</i> , 2011)    | The face validity was discussed in the focus group during pilot test. The content validity was                                                                                  | Good         | na                                                                                                                   | na           | As hypothesised, MHL was associated with socio-economic determinants, particularly with gender ( $\beta = 1.25$ , $p < 0.001$ ) and                                                                                                                                                                                                                                                    | Good         | na                      | na           |

| Instrument                             | Content validity                                                                                                                                                                           |              | Structural validity                                                                                                                                      |              | Hypotheses-testing                                                                                                                                                                                                                                    |              | Cross-cultural validity |              |
|----------------------------------------|--------------------------------------------------------------------------------------------------------------------------------------------------------------------------------------------|--------------|----------------------------------------------------------------------------------------------------------------------------------------------------------|--------------|-------------------------------------------------------------------------------------------------------------------------------------------------------------------------------------------------------------------------------------------------------|--------------|-------------------------|--------------|
|                                        | Results                                                                                                                                                                                    | COSMIN score | Results                                                                                                                                                  | COSMIN score | Results                                                                                                                                                                                                                                               | COSMIN score | Results                 | COSMIN score |
|                                        | analysed using theory and operational definitions of health literacy and media literacy, and adolescents were invited to write detailed, anonymous responses.                              |              |                                                                                                                                                          |              | mother's education ( $\beta=0.16$ , $p=0.04$ ). In addition, MHL was also associated with health behaviours ( $\beta=0.03$ , $p=0.05$ ) and health empowerment ( $\beta=0.36$ , $p<0.001$ ).                                                          |              |                         |              |
| DNT-39 (Mulvaney <i>et al.</i> , 2013) | The DNT-39 was developed from the original 43-item version DNT-43 by eliminating questions specific to type 2 diabetes. An expert team developed the DNT-43 and refined it.                | Poor         | na                                                                                                                                                       | na           | The DNT-39 was associated with WRAT-3 and parent education ( $\rho=0.40$ , $p=0.001$ ; $\rho=0.29$ , $p=0.028$ respectively)                                                                                                                          | Fair         | na                      | na           |
| DNT-14 (Mulvaney <i>et al.</i> , 2013) | The DNT-14 was developed from the original 15-item version DNT-15 by eliminating 1 question specific to type 2 diabetes. An expert team developed the DNT-15 by data analysis from DNT-43. | Poor         | na                                                                                                                                                       | na           | The DNT-14 was associated with the Wide-Ranging Achievement Test (WRAT3), parent education, diabetes problem solving and HbA1c ( $\rho=0.36$ , $p=0.005$ ; $\rho=0.31$ , $p=0.019$ ; $\rho=0.27$ , $p=0.023$ ; $\rho=-0.34$ , $p=0.004$ respectively) | Fair         | na                      | na           |
| eHEALS (Norman and Skinner, 2006)      | The eHEALS was developed by the expert team and pilot-tested and refined by feedback from participants.                                                                                    | Good         | Explorative principal components factor analysis was conducted and 56% of the variance was accounted by a single factor. The factor loadings ranged from | Fair         | Correlations were assumed between eHEALS and other measured variables (gender, age, use of information technology overall, self-evaluations of health). However, only gender difference was found at baseline level of eHealth literacy               | Fair         | na                      | na           |

| Instrument                                  | Content validity                                                                                                                                                                 |              | Structural validity                                                                                                                                                                                                                                               |              | Hypotheses-testing                                                                                                                                                                                                                                                                            |                                                                | Cross-cultural validity |              |
|---------------------------------------------|----------------------------------------------------------------------------------------------------------------------------------------------------------------------------------|--------------|-------------------------------------------------------------------------------------------------------------------------------------------------------------------------------------------------------------------------------------------------------------------|--------------|-----------------------------------------------------------------------------------------------------------------------------------------------------------------------------------------------------------------------------------------------------------------------------------------------|----------------------------------------------------------------|-------------------------|--------------|
|                                             | Results                                                                                                                                                                          | COSMIN score | Results                                                                                                                                                                                                                                                           | COSMIN score | Results                                                                                                                                                                                                                                                                                       | COSMIN score                                                   | Results                 | COSMIN score |
|                                             |                                                                                                                                                                                  |              | 0.60-0.84 among the 8 items.                                                                                                                                                                                                                                      |              |                                                                                                                                                                                                                                                                                               | ( $t=2.236$ , $p=0.026$ ). No convergent validity is assessed. |                         |              |
| CHC Test (Steckelberg <i>et al.</i> , 2009) | The CHC Test was developed by the research team and pre-tested by collecting qualitative data and quantitative field test.                                                       | Good         | IRT test for determining dimensionality was performed.                                                                                                                                                                                                            | Poor         | na                                                                                                                                                                                                                                                                                            | na                                                             | na                      | na           |
| HKACSS (Schmidt <i>et al.</i> , 2010)       | The HKACSS items were taken from a previous health survey and selected basing on consideration of item content.                                                                  | Good         | na                                                                                                                                                                                                                                                                | na           | As hypothesised, health communication, attitudes and self-efficacy were significantly related to each other ( $\rho=0.15-0.38$ , $P<0.05$ ). And children from higher educational background showed a better knowledge and communicated more about health topics ( $\beta=0.16$ , $p<0.05$ ). | Good                                                           | na                      | na           |
| HLAT-51 (Harper, 2014)                      | The expert team evaluated the initial items using a 5-point Likert scale according to their research experience. And 144 college students were invited to complete a pilot test. | Good         | Comprehension (CFI=0.80; TLI=0.78; RMSEA=0.09); health numeracy (CFI=0.57; TLI=0.48; RMSEA=0.09); media literacy (CFI=0.88; TLI=0.84; RMSEA=0.07); digital literacy (CFI=0.33; TLI=0.06; RMSEA=0.16); health information seeking (CFI=0.80; TLI=0.66; RMSEA=0.17) | Poor         | na                                                                                                                                                                                                                                                                                            | na                                                             | na                      | na           |

| Instrument                            | Content validity -----                                                                                                                                                 |              | Structural validity                                                                                                                                                                                                                                                 |              | Hypotheses-testing                                                                                                                                                                                                                                                                                                                                                                                |              | Cross-cultural validity |              |
|---------------------------------------|------------------------------------------------------------------------------------------------------------------------------------------------------------------------|--------------|---------------------------------------------------------------------------------------------------------------------------------------------------------------------------------------------------------------------------------------------------------------------|--------------|---------------------------------------------------------------------------------------------------------------------------------------------------------------------------------------------------------------------------------------------------------------------------------------------------------------------------------------------------------------------------------------------------|--------------|-------------------------|--------------|
|                                       | Results                                                                                                                                                                | COSMIN score | Results                                                                                                                                                                                                                                                             | COSMIN score | Results                                                                                                                                                                                                                                                                                                                                                                                           | COSMIN score | Results                 | COSMIN score |
| HLAT-8<br>(Abel <i>et al.</i> , 2014) | The research team developed the HALT-8 drawing on literature review and their own experience. No target population is involved in item generation.                     | Poor         | Explorative principal components factor analysis was conducted and 72.96% of the variance was accounted by four factors among male. In addition, the factor structure was validated using confirmatory factor analysis (CFI=0.99; TLI=0.97; RMSEA=0.03; SRMR=0.03). | Excellent    | Hypotheses were formulated a priori regarding correlations between health literacy and gender, socio-cultural characteristics and health values. Results showed that female, higher educational status, and a stronger health valuation were associated with higher HL scores ( $p<0.05$ , respectively).                                                                                         | Good         | na                      | na           |
| CHLT (Liu <i>et al.</i> , 2014)       | The research team developed the CHLT drawing on literature review, expert consultation and pilot test. 12 six graders were piloted about the instrument's readability. | Good         | Confirmatory factor analysis was conducted to test the unidimensionality of each subscale. The factor loadings ranged from 0.20-0.58.                                                                                                                               | Fair         | Hypotheses were formulated a priori regarding correlations between health literacy and gender, self-reported health and health behaviours. Results showed that female, better health status, normal BMI and healthy behaviours were positively associated with HL scores ( $p<0.05$ , respectively). Health-risky behaviours were negatively associated with health literacy scores ( $p<0.05$ ). | Fair         | na                      | na           |
| VOHL<br>(Ueno <i>et al.</i> , 2014)   | na                                                                                                                                                                     | na           | na                                                                                                                                                                                                                                                                  | na           | Correlations were conducted between health literacy and gender. Results showed female students had higher gingiva scores than male students                                                                                                                                                                                                                                                       | Fair         | na                      | na           |

| Instrument                              | Content validity                                                                                                                                                      |              | Structural validity                                                                                                                                                                                   |              | Hypotheses-testing                                                                                                                                                                                                                                                                                                                                                                                                                                                                                                          |              | Cross-cultural validity |              |
|-----------------------------------------|-----------------------------------------------------------------------------------------------------------------------------------------------------------------------|--------------|-------------------------------------------------------------------------------------------------------------------------------------------------------------------------------------------------------|--------------|-----------------------------------------------------------------------------------------------------------------------------------------------------------------------------------------------------------------------------------------------------------------------------------------------------------------------------------------------------------------------------------------------------------------------------------------------------------------------------------------------------------------------------|--------------|-------------------------|--------------|
|                                         | Results                                                                                                                                                               | COSMIN score | Results                                                                                                                                                                                               | COSMIN score | Results                                                                                                                                                                                                                                                                                                                                                                                                                                                                                                                     | COSMIN score | Results                 | COSMIN score |
|                                         |                                                                                                                                                                       |              |                                                                                                                                                                                                       |              | ( $p < 0.05$ ). However, no gender differences were found regarding tooth scores.                                                                                                                                                                                                                                                                                                                                                                                                                                           |              |                         |              |
| HAS-A (Manganello <i>et al.</i> , 2015) | The research team developed the HAS-A drawing on literature review, expert consultation and pilot test. Scale items were piloted with undergraduates.                 | Good         | Exploratory factor analysis was conducted and 41% of the variance was accounted by three factors.                                                                                                     | Fair         | Communication scale, confusion scale, and understanding scale were all correlated with the AURA scale ( $r = 0.69$ , $p < 0.001$ ; $r = -0.50$ , $p < 0.001$ ; $r = -0.42$ , $p < 0.001$ ). The correlation between communication scale, confusion scale and understanding scale and REALM-Teen and NVS were small, ranging from -0.26 to 0.08. Also health literacy scores were compared by demographics. There was no difference in scores by sex or age, but a significant difference by race/ethnicity ( $p < 0.001$ ). | Fair         | na                      | na           |
| MaHeLi (Naigaga <i>et al.</i> 2015)     | The research team developed the MaHeLi based on the health belief model and integrated model of health literacy. No target population is involved in item generation. | Poor         | The health-seeking behaviour (HSB) subscale brought substantial multidimensionality into the MeHeLi scale. After removing most items of the HSB subscale, the MeHeLi scale showed a unidimensionality | Fair         | na                                                                                                                                                                                                                                                                                                                                                                                                                                                                                                                          | na           | na                      | na           |

| Instrument                                            | Content validity                                                                                                                                                         |              | Structural validity                                                                                                                                                                                                                                                                                                                      |              | Hypotheses-testing                                                                                                                                                                                                                                                     |              | Cross-cultural validity |              |
|-------------------------------------------------------|--------------------------------------------------------------------------------------------------------------------------------------------------------------------------|--------------|------------------------------------------------------------------------------------------------------------------------------------------------------------------------------------------------------------------------------------------------------------------------------------------------------------------------------------------|--------------|------------------------------------------------------------------------------------------------------------------------------------------------------------------------------------------------------------------------------------------------------------------------|--------------|-------------------------|--------------|
|                                                       | Results                                                                                                                                                                  | COSMIN score | Results                                                                                                                                                                                                                                                                                                                                  | COSMIN score | Results                                                                                                                                                                                                                                                                | COSMIN score | Results                 | COSMIN score |
|                                                       |                                                                                                                                                                          |              | construct with some but not too noticeable multi-dimensionality.                                                                                                                                                                                                                                                                         |              |                                                                                                                                                                                                                                                                        |              |                         |              |
| QuALiSMental (de Jesus Loureiro <i>et al.</i> , 2015) | The questionnaire was developed based on mental health literacy framework and adapted among Portuguese adolescents and young people.                                     | Excellent    | Exploratory factor analysis was conducted for each component of the questionnaire. A five-factor solution explained 46.84% of the total variance for component 1 and 40.00% for components 2 and 3. A three-factor solution explained 47.24% of the variance for component 4 and a two-factor solution explained 55.63% for component 5. | Fair         | The relationship between mental health components and mental health help-seeking intention was examined using a binary logistic regression analysis. Results showed higher levels of mental health literacy tended to associate with mental health-seeking intentions. | Fair         | na                      | na           |
| FCCHL-AYAC (McDonald <i>et al.</i> , 2016)            | The instrument was adapted from the functional, communicative, and critical health literacy scale to be suitable for adolescents and young adults diagnosed with cancer. | Good         | Exploratory factor analysis was conducted for the entire scale. The screen plot suggested the extraction of three factors (53.1% variance explained)                                                                                                                                                                                     | Fair         | Health literacy scores were examined by gender, whether the measure was completed online or on paper, whether the participant was on or off treatment. Results showed no significant difference was found.                                                             | Fair         | na                      | na           |
| ICHL (Smith <i>et al.</i> , 2016)                     | The instrument was developed from formative interviews with 20 deaf/hard-of hearing high                                                                                 | Good         | na                                                                                                                                                                                                                                                                                                                                       | na           | The relationship between ICHL and standard health literacy measures were examined. Result showed most ICHL items                                                                                                                                                       | Fair         | na                      | na           |

| Instrument                            | Content validity                                                                                                                                                                                  |              | Structural validity                                                                                                                                                                                                                                              |              | Hypotheses-testing                                                                                                                                                                                |              | Cross-cultural validity |              |
|---------------------------------------|---------------------------------------------------------------------------------------------------------------------------------------------------------------------------------------------------|--------------|------------------------------------------------------------------------------------------------------------------------------------------------------------------------------------------------------------------------------------------------------------------|--------------|---------------------------------------------------------------------------------------------------------------------------------------------------------------------------------------------------|--------------|-------------------------|--------------|
|                                       | Results                                                                                                                                                                                           | COSMIN score | Results                                                                                                                                                                                                                                                          | COSMIN score | Results                                                                                                                                                                                           | COSMIN score | Results                 | COSMIN score |
|                                       | school students. Also the instrument was piloted with 18 individuals including content-expert and content-naïve deaf and hearing colleagues, teachers interpreters and students.                  |              |                                                                                                                                                                                                                                                                  |              | were related to health literacy skills instrument-short form, s-TOFHLA, and comprehensive heart disease knowledge questionnaire ( $p<0.05$ ).                                                     |              |                         |              |
| HELMA (Ghanbari <i>et al.</i> , 2016) | All items were initially generated by in-depth interviews with 67 adolescents. Then items were assessed by an expert panel review and 16 adolescents.                                             | Good         | Exploratory factor analysis was conducted and 53.37% of the variance was accounted by eight factors.                                                                                                                                                             | Good         | na                                                                                                                                                                                                | na           | na                      | na           |
| HLSAC (Paakkari <i>et al.</i> , 2016) | The research team developed the HLSAC drawing on literature review, expert review and pilot test. Scale items were piloted with 401 pupils (7 <sup>th</sup> graders and 9 <sup>th</sup> graders). | Good         | The five-factor structure was tested using confirmatory factor analysis (RMSEA=0.08; CFI=0.96; TLI=0.92; SRMR=0.03). However, due to high correlations between factors, one-factor structure was finally determined (RMSEA=0.08; CFI=0.94; TLI=0.92; SRMR=0.04). | Fair         | Correlations were assumed between the final 10-item scale and the original 15-item scale. Results showed the 10-item HLSAC predicted approximately 97% of the variance of the 15-item instrument. | Fair         | na                      | na           |

| Instrument                                    | Content validity                                                                                                                                                                              |              | Structural validity                                                                                                                              |              | Hypotheses-testing                                                                                                                                                                                                                                                               |              | Cross-cultural validity |              |
|-----------------------------------------------|-----------------------------------------------------------------------------------------------------------------------------------------------------------------------------------------------|--------------|--------------------------------------------------------------------------------------------------------------------------------------------------|--------------|----------------------------------------------------------------------------------------------------------------------------------------------------------------------------------------------------------------------------------------------------------------------------------|--------------|-------------------------|--------------|
|                                               | Results                                                                                                                                                                                       | COSMIN score | Results                                                                                                                                          | COSMIN score | Results                                                                                                                                                                                                                                                                          | COSMIN score | Results                 | COSMIN score |
| REALM-TeenS (Manganello <i>et al.</i> , 2017) | This instrument was derived from the original 66-item REALM-Teen using the item response theory. Also, ten teenage patients were piloted.                                                     | Good         | na                                                                                                                                               | na           | The REALM-TeenS scores were correlated with the REALM-Teen ( $r=0.92$ , $p<0.001$ ). Item fit analysis using the differential item functioning showed the REALM-TeenS functioned well for different groups of sex, race/ethnicity, and language spoken at home.                  | Good         | na                      | na           |
| funHLS-YA (Tsubakita <i>et al.</i> , 2017)    | Items were generated from health materials that were frequently used in young adults and reviewed by the research team. No target population was involved in pilot test.                      | Poor         | 1-factor model was supported by the exploratory factor analysis.                                                                                 | Fair         | The correlation between funHLS-YA and the comparator instrument of functional health literacy was 0.191 ( $p<0.001$ ).                                                                                                                                                           | Fair         | na                      | na           |
| HLS-TCO (Intarakamha ng <i>et al.</i> , 2017) | Items were developed from theories, documents and related research. Also, focus group and expert review were used to develop the instrument. 100 samples of overweight children were piloted. | Good         | Confirmatory factor analysis was conducted for each subscale and results showed the model was acceptable, with factor loading ranging 0.39-0.73. | Fair         | The path model of health literacy for obesity prevention behaviours was conducted using structural equation modelling. Results showed the hypothetical causal model was consistent with empirical data (chi-square=60.10, $p=0.00$ , $df=12$ , RMSEA=0.05, CFI=0.99; AGFI=0.99). | Fair         | na                      | na           |
| HLRS-Y (Bradley-Klug <i>et al.</i> , 2017)    | Items were generated by focus group, expert review and a pilot test with 25 participants.                                                                                                     | Excellent    | Exploratory factor analysis was conducted, and results showed a three-factor structure of the instrument.                                        | Fair         | The relationships between health literacy scores and demographics were examined and results showed insurance type and knowledge, time since diagnosis and knowledge and                                                                                                          | Fair         | na                      | na           |

| Instrument                              | Content validity                                                                                                                                       |              | Structural validity                                                                                                                        |              | Hypotheses-testing |                                                                                                                                                                                                                                                             | Cross-cultural validity |                                                                                                                                                                                                                                                                     |      |
|-----------------------------------------|--------------------------------------------------------------------------------------------------------------------------------------------------------|--------------|--------------------------------------------------------------------------------------------------------------------------------------------|--------------|--------------------|-------------------------------------------------------------------------------------------------------------------------------------------------------------------------------------------------------------------------------------------------------------|-------------------------|---------------------------------------------------------------------------------------------------------------------------------------------------------------------------------------------------------------------------------------------------------------------|------|
|                                         | Results                                                                                                                                                | COSMIN score | Results                                                                                                                                    | COSMIN score | Results            | COSMIN score                                                                                                                                                                                                                                                | Results                 | COSMIN score                                                                                                                                                                                                                                                        |      |
| p_HLAT-8 (Quemelo <i>et al.</i> , 2017) | The p_HLAT-8 was translated from the HLAT-8 according to translation procedures and was tested among 10 university students to ensure appropriateness. | Good         | Confirmatory factor analysis was conducted, and results showed the 4-factor model fit was fair (CFI=0.97, GFI=0.98, TLI=0.95, RMSEA=0.03). | Fair         | self-advocacy.     | Convergent validity was examined for each sub-scale, but the results showed that only the factor 'search for information' was adequate. Discriminant validity was only adequate for two factors ('search for information' and 'understanding information'). | Fair                    | Three experts in the field of health forward and backward translated the scale independently. Ten university students were piloted to test and ensure the cultural congruence of the scale. Confirmatory factor analysis showed a 4-factor structure fit the model. | Fair |

Note: na, no information available. AGFI, Adjusted Goodness of Fit Index; AURA, Ask, Understand, Remember and Assessment; CFI, Comparative Fit Index; CHC Test, the Critical Health Competence Test; CHLT, Child Health Literacy Test; c-sTOFHLAd, the Chinese version of short-form Test of Functional Health Literacy in Adolescents; DNT, the Diabetes Numeracy Test; eHEALS, the eHealth Literacy Scale; FCCHL-AYAC, the Functional, Communicative, and Critical Health Literacy-Adolescents and Young Adults Cancer; funHLS-YA, Functional Health Literacy Scale for Young Adults; HAS-A, the Health Literacy Assessment Scale for Adolescents; HELMA, the Health Literacy Measure for Adolescents; HKACSS, the Health Knowledge, Attitudes, Communication and Self-efficacy Scale; HLAB, Health Literacy Assessment Booklet; HLAT-8, the 8-item Health Literacy Assessment Tool; HLAT-51, the 51-item Health Literacy Assessment Tool; HLRS-Y, Health Literacy and Resiliency Scale: Youth Version; HLSAC, The Health Literacy for School-aged Children; HLS-TCO, Health Literacy Scale for Thai Childhood Overweight; ICHL, Interactive and Critical Health Literacy; MaHeLi, the Maternal Health Literacy; MHL, the Media Health Literacy; MMAHL, the Multidimensional Measure of Adolescent Health Literacy; NVS, the Newest Vital Sign; p\_HLAT-8, Portuguese version of the 8-item Health Literacy Assessment Tool; QuALiSMental, the Questionnaire for Assessment of Mental Health Literacy; REALM-Teen, the Rapid Estimate of Adolescent Literacy in Medicine; REALM-TeenS, the Rapid Estimate of Adolescent Literacy in Medicine Short Form; RMSEA, Root Mean Square Error of Approximation; SRMR, Standardized Root Mean Square Residual; SORT-R, Slosson Oral Reading Test-Revised; s-TOFHLA, the short-form Test of Functional Health Literacy in Adults; TLI, Tucker-Lewis Index; TOFHLA, the Test of Functional Health Literacy in Adults; VOHL, the Visual Oral Health Literacy; WRAT-3, Wide-Range Achievement Test-Revised.

**Appendix Table 3. The methodological quality of each study based on responsiveness for each health literacy instrument**

| Instrument                       | Responsiveness                                                                                                                                              |              |
|----------------------------------|-------------------------------------------------------------------------------------------------------------------------------------------------------------|--------------|
|                                  | Results                                                                                                                                                     | COSMIN score |
| VOHL (Ueno <i>et al.</i> , 2014) | Comparison of health literacy scores before and after health education showed both tooth and gingiva scores significantly increased after health education. | Fair         |

Note: As there was only one study examining the instrument's responsiveness, we only presented the instrument of VOHL. VOHL, the Visual Oral Health Literacy.
